# Supplementary material for: A Tumor-Specific Neo-Antigen Caused by a Frameshift Mutation in BAP1 Is a Potential Personalized Biomarker in Malignant Peritoneal Mesothelioma
Source: PubMed Central journal article supplement (PMC4881561; doi:10.3390/ijms17050739), 2016-05-14
Supplement: ijms-17-00739-s001.pdf [file ijms-17-00739-s001.pdf]

## Supplemental Material: A Tumor-Specific Neo-Antigen Caused by a Frameshift Mutation in *BAP1* is a Potential Personalized Biomarker in Malignant Peritoneal Mesothelioma

Jun Lai, Zhan Zhou, Xiao-Jing Tang, Zhi-Bin Gao, Jie Zhou and Shu-Qing Chen

Table S1. 725 targeted genes in GenCap™ oncocap\_725 kit.

|                 |                 |                 |                 |                 |                 |                 |                |               |                 |
|-----------------|-----------------|-----------------|-----------------|-----------------|-----------------|-----------------|----------------|---------------|-----------------|
| <i>ABI1</i>     | <i>ABI3</i>     | <i>ABL1</i>     | <i>ABL2</i>     | <i>ABLIM1</i>   | <i>ACBD6</i>    | <i>ACCS</i>     | <i>ACSL3</i>   | <i>ACSL6</i>  | <i>ACVR1B</i>   |
| <i>ADAM12</i>   | <i>ADAM19</i>   | <i>ADAM29</i>   | <i>ADAMTS16</i> | <i>ADAMTS18</i> | <i>ADAMTS20</i> | <i>ADAMTSL3</i> | <i>AFF1</i>    | <i>AFF3</i>   | <i>AIM1</i>     |
| <i>AKAP12</i>   | <i>AKAP9</i>    | <i>AKT1</i>     | <i>AKT2</i>     | <i>AKT3</i>     | <i>ALK</i>      | <i>APC</i>      | <i>APC2</i>    | <i>APOL1</i>  | <i>ARF1</i>     |
| <i>ARHGAP26</i> | <i>ARHGEF12</i> | <i>ARID1A</i>   | <i>ARNT</i>     | <i>ARRB2</i>    | <i>ASF1A</i>    | <i>ASPSCR1</i>  | <i>ASXL1</i>   | <i>ATF1</i>   | <i>ATIC</i>     |
| <i>ATM</i>      | <i>ATP10B</i>   | <i>ATP13A3</i>  | <i>BAG2</i>     | <i>BAP1</i>     | <i>BCL10</i>    | <i>BCL11A</i>   | <i>BCL11B</i>  | <i>BCL2</i>   | <i>BCL2L1</i>   |
| <i>BCL3</i>     | <i>BCL6</i>     | <i>BCL7A</i>    | <i>BCL9</i>     | <i>BCR</i>      | <i>BHLHE40</i>  | <i>BIN1</i>     | <i>BIRC3</i>   | <i>BLM</i>    | <i>BMI1</i>     |
| <i>BMPR1A</i>   | <i>BNIP3L</i>   | <i>BRAF</i>     | <i>BRCA1</i>    | <i>BRCA2</i>    | <i>BRD3</i>     | <i>BRD4</i>     | <i>BRD7</i>    | <i>BRIP1</i>  | <i>BTG1</i>     |
| <i>BUB1</i>     | <i>BUB1B</i>    | <i>C15orf55</i> | <i>C18orf32</i> | <i>C2orf40</i>  | <i>CANT1</i>    | <i>CAPN1</i>    | <i>CARD10</i>  | <i>CARD11</i> | <i>CARD8</i>    |
| <i>CARS</i>     | <i>CASC5</i>    | <i>CASP1</i>    | <i>CASP8</i>    | <i>CBFA2T3</i>  | <i>CBFB</i>     | <i>CBL</i>      | <i>CBLB</i>    | <i>CBLC</i>   | <i>CBX8</i>     |
| <i>CCDC6</i>    | <i>CCL2</i>     | <i>CCL26</i>    | <i>CCNA2</i>    | <i>CCNB1</i>    | <i>CCNB1IP1</i> | <i>CCND1</i>    | <i>CCND2</i>   | <i>CCND3</i>  | <i>CCNDBP1</i>  |
| <i>CD27</i>     | <i>CD3EAP</i>   | <i>CD74</i>     | <i>CDC25C</i>   | <i>CDC42EP1</i> | <i>CDC6</i>     | <i>CDC73</i>    | <i>CDH1</i>    | <i>CDH10</i>  | <i>CDH11</i>    |
| <i>CDK1</i>     | <i>CDK2</i>     | <i>CDK4</i>     | <i>CDK5</i>     | <i>CDK6</i>     | <i>CDKN1A</i>   | <i>CDKN1B</i>   | <i>CDKN1C</i>  | <i>CDKN2A</i> | <i>CDKN2AIP</i> |
| <i>CDKN2B</i>   | <i>CDKN2C</i>   | <i>CDKN2D</i>   | <i>CDX2</i>     | <i>CEBPA</i>    | <i>CEP110</i>   | <i>CHCHD7</i>   | <i>CHEK1</i>   | <i>CHEK2</i>  | <i>CHIC2</i>    |
| <i>CHN1</i>     | <i>CIC</i>      | <i>CIITA</i>    | <i>CIRBP</i>    | <i>CITED2</i>   | <i>CLDN1</i>    | <i>CLP1</i>     | <i>CLTC</i>    | <i>CLTCL1</i> | <i>CNBP</i>     |
| <i>COL1A1</i>   | <i>COMMD2</i>   | <i>COMMD3</i>   | <i>COMMD4</i>   | <i>COMMD5</i>   | <i>COMMD6</i>   | <i>COMMD8</i>   | <i>COX6C</i>   | <i>CRAF</i>   | <i>CREB1</i>    |
| <i>CREB3L2</i>  | <i>CREBBP</i>   | <i>CREG1</i>    | <i>CRTC1</i>    | <i>CRTC3</i>    | <i>CSF1R</i>    | <i>CTNNA1</i>   | <i>CTNNA2</i>  | <i>CTNNB1</i> | <i>CTSF</i>     |
| <i>CTSW</i>     | <i>CXCL1</i>    | <i>CXCR7</i>    | <i>CYB561</i>   | <i>CYLD</i>     | <i>DAP3</i>     | <i>DARC</i>     | <i>DCLRE1B</i> | <i>DDB2</i>   | <i>DDIT3</i>    |
| <i>DDX10</i>    | <i>DDX5</i>     | <i>DDX6</i>     | <i>DEK</i>      | <i>DICER1</i>   | <i>DLEC1</i>    | <i>DMTF1</i>    | <i>DNMT3A</i>  | <i>DUSP3</i>  | <i>DUSP4</i>    |
| <i>DUSP6</i>    | <i>DYRK1A</i>   | <i>E2F1</i>     | <i>E2F3</i>     | <i>EDF1</i>     | <i>EFEMP1</i>   | <i>EGFR</i>     | <i>EIF4A2</i>  | <i>ELF4</i>   | <i>ELK4</i>     |
| <i>ELL</i>      | <i>ELN</i>      | <i>EML4</i>     | <i>ENDOG</i>    | <i>EP300</i>    | <i>EPHA3</i>    | <i>EPHA4</i>    | <i>EPHA7</i>   | <i>EPHB6</i>  | <i>EPS15</i>    |

|          |          |          |         |           |         |         |         |           |                 |
|----------|----------|----------|---------|-----------|---------|---------|---------|-----------|-----------------|
| ERBB2    | ERC1     | ERCC2    | ERCC3   | ERCC4     | ERCC5   | ERG     | ETS1    | ETS2      | ETV4            |
| ETV5     | EWSR1    | EXT1     | EXT2    | EZH2      | EZR     | FAM123B | FANCA   | FANCC     | FANCD2          |
| FANCE    | FANCF    | FANCG    | FAS     | FBX031    | FBXW7   | FCGR2B  | FCGR3A  | FCHSD1    | FCRL4           |
| FEV      | FGFR1OP  | FGFR2    | FGFR3   | FH        | FHL2    | FIP1L1  | FLCN    | FLI1      | FLT3            |
| FLT4     | FN1      | FOXA1    | FOXL2   | FOXO1     | FOXO3   | FOXO4   | FOXP1   | FRA6F     | FSTL3           |
| FUS      | GADD45A  | GAS7     | GATA1   | GATA2     | GLI1    | GLI3    | GMPS    | GNAQ      | GNAS            |
| GNG11    | GOLGA5   | GOPC     | GPC3    | GPHN      | GRIN2A  | GUCY1A2 | HEPACAM | HERPUD1   | HIP1            |
| HIRA     | HIST1H4I | HLF      | HMGA1   | HMGA2     | HMOX1   | HMOX2   | HNF1A   | HNRNPA2B1 | HOOK3           |
| HOXA11   | HOXA13   | HOXA9    | HOXC11  | HOXC13    | HOXD11  | HOXD13  | HPV6AI1 | HRAS      | HSP90AA1        |
| HSP90AB1 | HSPA9    | ID1      | ID2     | IDH1      | IDH2    | IER3    | IFI16   | IGFBP3    | IGFBP7          |
| IKBKB    | IKBKE    | IKBKG    | IL12A   | IL1R1     | IL2     | IL20    | IL21R   | IL6ST     | INF2            |
| INK4A    | INTS4    | IRAK1    | IRAK1   | IRAK2     | IRF1    | IRF2    | IRF3    | IRF4      | IRF5            |
| IRF7     | IRF8     | IRS4     | ISG15   | ITCH      | ITGAD   | ITGAE   | ITGB2   | ITGB3BP   | ITK             |
| JAK2     | JAK3     | JAZF1    | JUNB    | JUND      | KDM5C   | KDM6A   | KDR     | KDSR      | KIAA1549        |
| KIT      | KL       | KLF6     | KLK2    | KLRG1     | KRAS    | KSR1    | KSR2    | KTN1      | LASP1           |
| LCK      | LCP1     | LDB3     | LEO1    | LHFP      | LIFR    | LIMS1   | LIMS2   | LIMS3     | LIMS3-LOC440895 |
| LIMS3L   | LMNA     | LMO1     | LMO2    | LOC651644 | LOXL1   | LOXL2   | LOXL3   | LOXL4     | LPP             |
| LYL1     | LYL1     | MAD2L1BP | MAF     | MAFB      | MALT1   | MAML2   | MAP2K3  | MAP2K4    | MAP2K7          |
| MAP3K14  | MAP3K3   | MAP3K8   | MAPK14  | MAPKAPK5  | MAPKBP1 | MCM2    | MDM4    | MECOM     | MEN1            |
| MET      | MIR146A  | MIR17    | MIR205  | MIR217    | MIR22   | MIR29A  | MIR30A  | MIR34A    | MIR34B          |
| MIR34C   | MIR93    | MITF     | MKL1    | MLF1      | MLH1    | MLL     | MLL2    | MLL3      | MLLT1           |
| MLLT10   | MLLT11   | MLLT3    | MLLT4   | MLLT6     | MMP2    | MN1     | MNX1    | MORF4     | MPL             |
| MSH2     | MSH6     | MSI2     | MSN     | MT-CYB    | MTCP1   | MTOR    | MUC1    | MUTYH     | MXD3            |
| MXD4     | MYC      | MYCL1    | MYCN    | MYD88     | MYH11   | MYH9    | MYST3   | MYST4     | NACA            |
| NBN      | NCOA1    | NCOA2    | NCOA4   | NDFIP1    | NF1     | NF2     | NFKB1   | NFKB2     | NFKBIA          |
| NFKBIB   | NFKBID   | NFKBIE   | NFKBIL1 | NFKBIZ    | NFRKB   | NIN     | NINJ1   | NKAP      | NKAPL           |
| NKAPP1   | NKIRAS1  | NKIRAS2  | NLRP2   | NOD1      | NOD2    | NONO    | NOTCH1  | NOTCH2    | NOX4            |
| NPM1     | NR4A3    | NRAS     | NSD1    | NTRK1     | NTRK3   | NUAK1   | NUMA1   | NUP214    | NUP98           |

|           |          |         |          |         |          |              |          |         |          |
|-----------|----------|---------|----------|---------|----------|--------------|----------|---------|----------|
| NUTF2     | OLIG2    | OMD     | PAFAH1B2 | PALB2   | PATZ1    | PAX3         | PAX5     | PAX7    | PAX8     |
| PBRM1     | PBX1     | PCSK7   | PDCD11   | PDCD4   | PDE4DIP  | PDGFB        | PDGFRA   | PDGFRB  | PEA15    |
| PER1      | PHOX2B   | PIAS4   | PICALM   | PIK3CA  | PIK3CG   | PIK3R1       | PIM1     | PINK1   | PLA2R1   |
| PLAG1     | PLEKHG5  | PML     | PMS1     | PMS2    | POU2AF1  | POU5F1       | PPARG    | PPM1A   | PPP1R13L |
| PPP1R3A   | PPP2R1A  | PPP2R2C | PPP4C    | PRCC    | PRDM16   | PRF1         | PRG4     | PRKAR1A | PRKCZ    |
| PRKD1     | PRPF19   | PSD     | PTCH1    | PTEN    | PTK2     | PTPN11       | PTPN22   | PTPRU   | PTTG1    |
| RABEP1    | RAD51L1  | RAF1    | RANBP17  | RANBP2  | RAP1A    | RAP1GAP      | RAP1GDS1 | RARA    | RARB     |
| RASEF     | RASGRF2  | RB1     | RBBP8    | RBL1    | RBL2     | RBM15        | RBX1     | REL     | RELA     |
| RELB      | RET      | RGN     | RHOH     | RIPK1   | RNF25    | RNF43        | ROMO1    | ROS1    | RPL10L   |
| RPL22     | RPLP1    | RPN1    | RRAD     | RSL1D1  | RUNX1    | RUNX1T1      | S1PR2    | SAP30   | SBDS     |
| SDHB      | SDHC     | SDHD    | SEC31A   | SEN2    | SEN3     | SEN6         | SEN6A    | SEN6B   | SENP1    |
| 5-Sep     | 6-Sep    | 9-Sep   | SET      | SFPQ    | SFRS3    | SH3GL1       | SHC1     | SILV    | SIRT1    |
| SIRT6     | SKIL     | SLC22A9 | SLC45A3  | SLC50A1 | SMAD1    | SMAD2        | SMAD3    | SMAD4   | SMAD9    |
| SMARCA4   | SMARCB1  | SMO     | SOCS1    | SRC     | SRGAP3   | SS18         | SS18L1   | SSX1    | SSX2     |
| SSX4      | STIL     | STK11   | SUFU     | SUMO1   | SUMO2    | SUMO3        | SUMO4    | SUPT4H1 | SYK      |
| TAB2      | TAB3     | TAF15   | TAGLN    | TAL1    | TAL2     | TANK         | TBK1     | TBKBP1  | TCEA1    |
| TCF12     | TCF3     | TCF7L1  | TCF7L2   | TCL1A   | TCL6     | TEC          | TEK      | TERC    | TERT     |
| TET1      | TFE3     | TFEB    | TFG      | TFPT    | TFRC     | TGFB1I1      | TGFBR2   | TGM3    | THRAP3   |
| TICAM1    | TICAM2   | TIFAB   | TIMM50   | TLX1    | TLX3     | TMED4        | TMEM158  | TMPRSS2 | TNFAIP3  |
| TNFRSF10B | TNFRSF17 | TNFSF13 | TNFSF14  | TNIP1   | TNIP2    | TOP1         | TP53     | TP53BP1 | TPM3     |
| TPM4      | TPR      | TRADD   | TRAF1    | TRAF3   | TRAF3IP2 | TRAF3IP2-AS2 | TRIM24   | TRIM27  | TRIM33   |
| TRIP11    | TSC1     | TSC2    | TSC22D3  | TSHR    | TTL      | TUBB4        | TWIST1   | UBN1    | UNC5CL   |
| UQCRC2    | USP6     | USP9X   | USP9Y    | VHL     | WAS      | WHSC1        | WHSC1L1  | WLS     | WRN      |
| WT1       | XPA      | XPC     | YWHAB    | YWHAE   | YWHAG    | YWHAH        | YWHAQ    | YWHAZ   | ZBTB16   |
| ZBTB7A    | ZNF331   | ZNF384  | ZNF521   | ZSCAN4  | -        | -            | -        | -       | -        |

**Table S2.** Primer sequences for Sanger validation.

| Gene              | Chromosome | Position  | Primer (5' to 3')                | T <sub>m</sub> (°C) | Product Size (bp) |
|-------------------|------------|-----------|----------------------------------|---------------------|-------------------|
| <i>NOTCH2</i>     | 1          | 120497774 | F: TCAATAAGAACTATCACATGGGGCAG    | 60.5                | 231               |
|                   |            |           | R: CAGGGCAGAGATGTAACATTGACATT    | 60.4                |                   |
| <i>PDE4DIP</i>    | 1          | 144930847 | F: ACCGGAACAACTCCATCTGTCAT       | 60.3                | 224               |
|                   |            |           | R: CTGAGAGAAGTGCAAAGGAACTTGG     | 62.0                |                   |
| <i>MN1</i>        | 22         | 28193936  | F: CTTTGGAGCCGCTGCTACTG          | 61.9                | 222               |
|                   |            |           | R: CCACCGCTTGCCAGAACAT           | 59.7                |                   |
| <i>BAP1</i>       | 3          | 52437592  | F: GCAGGCCTGTGCTGATGAC           | 61.9                | 219               |
|                   |            |           | R: GCAATGAGAGTACAGACACGGC        | 61.9                |                   |
| <i>ATP10B</i>     | 5          | 160097517 | F: AGGAGGCATCTACTACTTTCCCC       | 62.0                | 220               |
|                   |            |           | R: CCTCCTTTTTCTCTGACCCC          | 61.9                |                   |
| <i>NSD1</i>       | 5          | 176721814 | F: TACTATCAGCTGTGGTCCAGAC        | 60.1                | 245               |
|                   |            |           | R: CTCAACAGCTCTCGGCATATGC        | 61.9                |                   |
| <i>RAF1</i>       | 3          | 12626480  | F: ACACAGTCAGTACCAGCCTC          | 61.9                | 224               |
|                   |            |           | R: GTGCGAAAGGACCCAACCTCG         | 61.9                |                   |
| <i>NSD1</i>       | 5          | 176665298 | F: TACAACAATTTTGGCCTGTGGACT      | 58.6                | 223               |
|                   |            |           | R: GCATGTCCACCTCCAAGTTCTG        | 61.9                |                   |
| <i>DICER1</i>     | 14         | 95599707  | F: GCTCCAGTATTAGTGTTTCGATTAGTA   | 60.5                | 221               |
|                   |            |           | R: GTAGTAAGCTGTGCTAGAACAAAAATGC  | 60.5                |                   |
| <i>NF2</i>        | 22         | 30054224  | F: CCCATCTCACTTAGCTCCAATGACA     | 61.9                | 225               |
|                   |            |           | R: AAGAGTCTATCGCCTTGAATGAAGA     | 60.4                |                   |
| <i>BIVM-ERCC5</i> | 13         | 103524612 | F: TCTCATTGCTGTGTAAGTAATTGTTTCC  | 60.5                | 240               |
|                   |            |           | R: CTCTAATTTTGTGCGAGATCAGGTTTCCC | 61.9                |                   |

Table S2. Cont.

| Gene         | Chromosome | Position  | Primer (5' to 3')               | Tm (°C) | Product Size (bp) |
|--------------|------------|-----------|---------------------------------|---------|-------------------|
| <i>RBBP8</i> | 18         | 20572853  | F: CTCCTCCTCAAGAAGAATTACCTACTCG | 62.2    | 232               |
|              |            |           | R: GACCCAAGACTGTGATGTGTGAAAAG   | 62.4    |                   |
| <i>PRG4</i>  | 1          | 186276044 | F: GACACGTCTACCACCCAACA         | 59.6    | 2689              |
|              |            |           | R: TGCCTTGATTGGGTACTCTCG        | 59.8    |                   |
